# Supplementary material for: How the fear of COVID-19 changed the way we look at human faces
Source: PeerJ journal article supplement (doi:10.7717/peerj.11380), 2021-04-29
Supplement: 2020.7_-_Supplementary_Material_1.pdf [file 2020.7_-_Supplementary_Material_1.pdf]

**Looking at your eyes? Only if you are COVID-19-free! How the fear of COVID-19 changed the way we look at human faces.**

Giovanni Federico, Donatella Ferrante, Francesco Marcatto, Maria Antonella Brandimonte

## Post-experimental Interview

### 1. Demographic information

- 1.1. Name and surname initials (*free text*).
- 1.2. Age (*free text, numbers only*).
- 1.3. Sex (*f, m, other*).
- 1.4. City of residence (*free text*).
- 1.5. Educational level (*none, elementary school, junior high school, high school, bachelor's degree, master's degree, post-graduate/doctorate*).
- 1.6. Occupation (*free text*).
- 1.7. Political orientation (*left, centre-left, centre, centre-right, right*).

### 2. Prior exposure to COVID-19

- 2.1. I am currently COVID-19 positive (*yes or no*).
- 2.2. I got sick of COVID-19, but now I'm cured and negative (*yes or no*).
- 2.3. In my circle of acquaintances, someone got sick of COVID-19 (*yes or no*).
- 2.4. In my circle of acquaintances, someone has died from COVID-19 (*yes or no*).

### 3. Risk perception

Instructions: *"Please answer the following questions with a number ranging from 1 (not at all) to 7 (a lot). There are no right or wrong answers."*

- 3.1. How risky is it for you coming into contact with a COVID-19 patient?
- 3.2. How likely is it for you coming into contact with a COVID-19 patient?
- 3.3. How much can you control the possibility of coming into contact with a COVID-19 patient?
- 3.4. Are you afraid of coming into contact with a COVID-19 patient?
- 3.5. Do you know what the consequences of coming into contact with a COVID-19 patient are?
- 3.6. How serious might be consequences you could have when coming into contact with a COVID-19 patient?

### 4. COVID-19-related behaviours

Instructions: *"Please indicate how frequently do you do the following behaviours"*.  
Possible answers: *NEVER, RARELY, SOMETIMES, OFTEN, VERY OFTEN, ALWAYS*.

When I left home in the last two weeks, I have...

- 4.1. ... used the mask.
- 4.2. ... used gloves.
- 4.3. ... used the hand sanitiser.
- 4.4. ... kept a distance of at least one meter from other people.
- 4.5. ... avoided crowded places.
- 4.6. ... avoided meeting friends/relatives.

### 5. COVID-19-related intentions

Instructions: *"Please indicate how frequently you will do the following behaviours"*.  
Possible answers: *Never, Rarely, Sometimes, Often, Very often, Always*.

When I leave home in the next two weeks, I will...

- 5.1. ... use the mask.
- 5.2. ... use gloves.
- 5.3. ... use the hand sanitiser.
- 5.4. ... keep a distance of at least one meter from other people.
- 5.5. ... avoid crowded places.
- 5.6. ... avoid meeting friends/relative.
