# Supplementary material for: How the fear of COVID-19 changed the way we look at human faces
Source: PeerJ. 2021 Apr 29;9:e11380. doi: 10.7717/peerj.11380 (PMC8088764; doi:10.7717/peerj.11380)
Supplement: Supplemental Information 2 [file peerj-09-11380-s002.xlsx]

## Sheet: Foglio1
SUBJECT DATA		EYE-TRACKING DATA (5000ms): MFT_EXP-CONDITION_AOI_TIME						EYE-TRACKING DATA (500ms) : MFT_EXP-CONDITION_AOI_TIME						POST-EXPERIMENTAL INTERVIEW
SEX	AGE	MFT_COVID-FREE_EYES_5000	MFT_COVID-FREE_MOUTH_5000	MFT_SICK_EYES_5000	MFT_SICK_MOUTH_5000	MFT_RECOVERED_EYES_5000	MFT_RECOVERED_MOUTH_5000	MFT_COVID-FREE_EYES_500	MFT_COVID-FREE_MOUTH_500	MFT_SICK_EYES_500	MFT_SICK_MOUTH_500	MFT_RECOVERED_EYES_500	MFT_RECOVERED_MOUTH_500	2.1	2.2	2.3	2.4	3.1	3.2	3.3	3.4	3.5	3.6	4.1	4.2	4.3	4.4	4.5	4.6	5.1	5.2	5.3	5.4	5.5	5.6
F	28	1962.1	448.4	758.8	1278.6	697.6	409.5	303	31.5	233.1	18.9	214.7	25	No	No	Yes	No	5	6	3	4	6	5	VERY OFTEN	NEVER	VERY OFTEN	OFTEN	ALWAYS	SOMETIMES	ALWAYS	SOMETIMES	VERY OFTEN	VERY OFTEN	ALWAYS	OFTEN
F	24	1220.3	754.4	1591.3	858.3	872.7	748.2	112.1	121.8	217.1	50,3+J3	147.3	106.9	No	No	Yes	Yes	5	6	4	6	6	5	ALWAYS	SOMETIMES	ALWAYS	VERY OFTEN	VERY OFTEN	ALWAYS	ALWAYS	SOMETIMES	ALWAYS	ALWAYS	ALWAYS	VERY OFTEN
F	27	1319.8	415.8	1514.1	561.3	1243.3	476.2	86.5	17.9	137.4	29.3	203.2	6.9	No	No	No	No	7	4	5	7	6	6	ALWAYS	SOMETIMES	ALWAYS	ALWAYS	ALWAYS	VERY OFTEN	ALWAYS	OFTEN	ALWAYS	ALWAYS	ALWAYS	ALWAYS
F	24	2163.1	284	2199	1414.2	1904.9	1221.6	224	16.5	143.2	67.6	115	67	No	No	Yes	No	4	3	5	7	7	5	ALWAYS	SOMETIMES	ALWAYS	ALWAYS	VERY OFTEN	VERY OFTEN	ALWAYS	OFTEN	ALWAYS	ALWAYS	ALWAYS	VERY OFTEN
F	24	124.2	1310.3	59.9	1467.6	215.7	1569.3	23	165	0	106.6	0	274.6	No	No	Yes	Yes	6	5	4	4	6	7	ALWAYS	NEVER	OFTEN	ALWAYS	ALWAYS	VERY OFTEN	ALWAYS	RARELY	VERY OFTEN	VERY OFTEN	VERY OFTEN	OFTEN
F	23	401.6	631.3	246.2	850.5	174.8	1433.1	81.6	70.8	43.5	155.2	83.3	59.5	No	No	Yes	Yes	6	7	4	6	7	6	ALWAYS	SOMETIMES	VERY OFTEN	VERY OFTEN	ALWAYS	SOMETIMES	ALWAYS	SOMETIMES	ALWAYS	VERY OFTEN	ALWAYS	SOMETIMES
F	21	378.8	162.7	90.5	505.8	241.3	655.7	81.5	15.4	44.6	85.2	56.7	75.7	No	No	No	No	7	5	3	5	3	5	ALWAYS	NEVER	OFTEN	OFTEN	OFTEN	OFTEN	ALWAYS	NEVER	OFTEN	OFTEN	OFTEN	OFTEN
M	20	312.7	1609.9	221.3	1767	248.5	1910.2	62.3	182.8	65	171.2	59.4	219.5	No	No	Yes	No	5	6	2	4	6	6	ALWAYS	NEVER	RARELY	SOMETIMES	VERY OFTEN	RARELY	ALWAYS	RARELY	OFTEN	SOMETIMES	VERY OFTEN	SOMETIMES
F	28	205.1	0	303.8	536.7	213	611.5	54.2	0	22.1	7.3	0	0	No	No	Yes	Yes	5	4	6	4	7	5	ALWAYS	OFTEN	ALWAYS	ALWAYS	VERY OFTEN	VERY OFTEN	ALWAYS	SOMETIMES	ALWAYS	ALWAYS	ALWAYS	VERY OFTEN
M	21	157.4	1205.9	130.4	896.1	186.2	986.4	32	126.8	39.1	111.6	0	137.1	Yes	No	Yes	No	4	4	5	2	6	3	ALWAYS	SOMETIMES	VERY OFTEN	SOMETIMES	SOMETIMES	RARELY	OFTEN	SOMETIMES	VERY OFTEN	OFTEN	OFTEN	SOMETIMES
F	25	1127.1	647.8	869.8	991.9	631.9	823.2	114.8	163.3	58	130.6	96.3	126	No	Yes	Yes	Yes	3	5	5	5	6	4	ALWAYS	NEVER	ALWAYS	VERY OFTEN	ALWAYS	ALWAYS	ALWAYS	SOMETIMES	ALWAYS	ALWAYS	ALWAYS	VERY OFTEN
M	30	926.6	1022.5	1026.8	762.8	667.5	1256	85.7	141.1	108.7	135.1	56.4	165.1	No	No	Yes	No	4	5	6	3	5	6	ALWAYS	NEVER	OFTEN	OFTEN	OFTEN	OFTEN	ALWAYS	NEVER	OFTEN	OFTEN	OFTEN	OFTEN
F	19	919.3	818.8	528.9	993.1	1350.6	881.1	96.4	94.2	33.6	169.3	75.8	156.1	No	No	Yes	Yes	7	6	5	7	7	5	VERY OFTEN	NEVER	ALWAYS	OFTEN	OFTEN	SOMETIMES	ALWAYS	RARELY	ALWAYS	VERY OFTEN	VERY OFTEN	SOMETIMES
F	24	637.6	1289.8	344	416.6	1091	777.8	50.7	172	31.8	71.3	176.5	16.7	No	No	Yes	Yes	7	5	6	7	6	5	ALWAYS	RARELY	ALWAYS	ALWAYS	ALWAYS	VERY OFTEN	ALWAYS	SOMETIMES	ALWAYS	ALWAYS	ALWAYS	OFTEN
M	35	2253.5	395.9	2243	1269.7	3112.9	1306	221.8	8.7	329	18.8	394.5	12.6	No	No	Yes	No	6	5	5	6	7	6	ALWAYS	RARELY	ALWAYS	ALWAYS	ALWAYS	OFTEN	ALWAYS	VERY OFTEN	ALWAYS	ALWAYS	ALWAYS	VERY OFTEN
M	22	1029.3	1282.4	2009.6	1022.2	1223.6	1774.4	57.1	204.3	148.2	144.1	60.6	174.9	No	No	No	No	7	4	3	4	7	7	ALWAYS	NEVER	VERY OFTEN	ALWAYS	ALWAYS	SOMETIMES	ALWAYS	NEVER	ALWAYS	ALWAYS	ALWAYS	SOMETIMES
M	24	2216.9	654.6	1682.8	540.7	1843.9	452.3	270.1	69.1	213.9	31.3	225.1	35.2	No	No	Yes	No	2	4	5	2	7	2	VERY OFTEN	RARELY	OFTEN	VERY OFTEN	ALWAYS	VERY OFTEN	ALWAYS	RARELY	OFTEN	VERY OFTEN	ALWAYS	VERY OFTEN
F	29	707.6	246.1	1007.3	592.2	309.6	707.7	66.2	10.5	91	61.7	0	60.6	No	No	Yes	No	5	6	3	5	6	6	ALWAYS	NEVER	ALWAYS	OFTEN	VERY OFTEN	OFTEN	ALWAYS	RARELY	ALWAYS	VERY OFTEN	VERY OFTEN	VERY OFTEN
F	23	172.5	1283.8	632.7	1292.8	222	1281.4	35.9	133.7	104.5	72.1	64.1	129.1	No	No	Yes	No	7	6	2	6	7	6	ALWAYS	VERY OFTEN	ALWAYS	ALWAYS	ALWAYS	VERY OFTEN	ALWAYS	VERY OFTEN	ALWAYS	ALWAYS	ALWAYS	ALWAYS
F	24	1112.6	205.5	436.2	788.3	627.2	738	46.6	0	28.7	32.9	47.3	16.1	No	No	Yes	Yes	5	4	5	4	6	5	ALWAYS	RARELY	ALWAYS	ALWAYS	VERY OFTEN	VERY OFTEN	ALWAYS	SOMETIMES	ALWAYS	VERY OFTEN	VERY OFTEN	OFTEN
M	28	1986.8	124.9	2473.3	171.4	951	304.7	215.9	9.2	239.5	41.1	219.7	37.1	No	No	Yes	No	3	6	2	3	7	6	ALWAYS	NEVER	VERY OFTEN	VERY OFTEN	OFTEN	RARELY	ALWAYS	NEVER	ALWAYS	ALWAYS	VERY OFTEN	RARELY
M	28	1158.6	837.2	1160	827.9	1205.4	266.1	111.8	47.6	86	25.4	57.3	45	No	No	Yes	No	2	2	4	1	7	5	ALWAYS	NEVER	OFTEN	VERY OFTEN	VERY OFTEN	ALWAYS	ALWAYS	SOMETIMES	VERY OFTEN	ALWAYS	ALWAYS	OFTEN
M	58	167.3	530.6	713.4	525.6	425.1	509.9	62.8	36.3	83.5	4.2	38.3	18.3	No	No	Yes	No	7	7	4	2	7	7	ALWAYS	VERY OFTEN	VERY OFTEN	VERY OFTEN	VERY OFTEN	OFTEN	ALWAYS	OFTEN	VERY OFTEN	OFTEN	VERY OFTEN	SOMETIMES
F	24	292.8	1343.8	382.2	1716.6	401.7	1703.4	40.9	166	48.3	164.4	130.2	187.2	No	No	Yes	No	7	4	6	5	7	7	ALWAYS	RARELY	ALWAYS	OFTEN	VERY OFTEN	SOMETIMES	VERY OFTEN	RARELY	ALWAYS	VERY OFTEN	VERY OFTEN	OFTEN
F	24	1340	570.2	1641.9	406.7	1222.8	628	93.3	59.8	136.1	69.1	106.1	85.6	No	No	Yes	Yes	7	6	6	6	6	5	ALWAYS	NEVER	OFTEN	VERY OFTEN	ALWAYS	ALWAYS	ALWAYS	NEVER	VERY OFTEN	VERY OFTEN	ALWAYS	ALWAYS
F	36	2153	462.1	1674.5	922.5	2312.8	1377.5	178.6	88.7	142.6	44.2	220.3	63.2	No	No	Yes	No	7	7	1	7	5	7	ALWAYS	NEVER	VERY OFTEN	ALWAYS	OFTEN	OFTEN	ALWAYS	NEVER	VERY OFTEN	VERY OFTEN	VERY OFTEN	VERY OFTEN
F	25	762.7	654.6	787.3	329.8	650	679.3	111.6	74.8	67.7	64.2	55.7	64.9	No	Yes	Yes	No	6	4	4	4	6	6	VERY OFTEN	SOMETIMES	ALWAYS	OFTEN	ALWAYS	RARELY	ALWAYS	SOMETIMES	ALWAYS	VERY OFTEN	ALWAYS	SOMETIMES
F	24	1480	683.1	1714.6	523.9	1217.5	468.5	183.3	80	116.3	33.6	105.8	48.7	No	No	Yes	No	5	7	2	3	7	6	ALWAYS	VERY OFTEN	VERY OFTEN	VERY OFTEN	ALWAYS	ALWAYS	ALWAYS	VERY OFTEN	ALWAYS	ALWAYS	ALWAYS	ALWAYS
M	32	2494.7	273.5	1110.6	709.2	997.9	952	284.4	39.3	193.8	36.7	217.9	85.8	No	No	Yes	No	5	5	4	5	7	5	ALWAYS	SOMETIMES	OFTEN	OFTEN	OFTEN	SOMETIMES	ALWAYS	RARELY	OFTEN	OFTEN	OFTEN	SOMETIMES
F	24	1361.1	573.6	455.9	833.7	486.2	1042.1	167	70.9	133.7	109	19.3	122.2	No	No	Yes	Yes	5	4	5	4	6	5	ALWAYS	RARELY	ALWAYS	ALWAYS	VERY OFTEN	VERY OFTEN	ALWAYS	SOMETIMES	ALWAYS	VERY OFTEN	VERY OFTEN	OFTEN
M	29	720.9	658.3	805.6	1707.9	1237.7	1098.5	92.7	117.4	108.7	128.6	32.2	195.6	No	No	Yes	No	5	3	2	1	4	5	VERY OFTEN	NEVER	OFTEN	ALWAYS	ALWAYS	VERY OFTEN	ALWAYS	RARELY	VERY OFTEN	ALWAYS	ALWAYS	OFTEN
F	28	99.7	1242.7	67.5	1276.7	69.1	1383.3	34.5	189.3	0	170.4	3.5	195.2	No	No	Yes	Yes	7	4	4	7	7	7	ALWAYS	NEVER	VERY OFTEN	ALWAYS	ALWAYS	ALWAYS	ALWAYS	OFTEN	ALWAYS	ALWAYS	ALWAYS	ALWAYS
M	28	2072.8	158	1428.4	492.9	1464.7	587.6	287.5	27	183.2	21.8	116.5	38.1	No	No	No	No	7	2	7	7	7	5	ALWAYS	NEVER	ALWAYS	SOMETIMES	ALWAYS	ALWAYS	ALWAYS	NEVER	ALWAYS	OFTEN	ALWAYS	ALWAYS
F	23	1704.9	696.2	1375.6	495.9	1147.1	639.2	157	45.4	87.8	44.3	121.7	34.2	No	No	No	No	6	7	5	4	6	6	ALWAYS	RARELY	ALWAYS	VERY OFTEN	ALWAYS	SOMETIMES	ALWAYS	SOMETIMES	ALWAYS	ALWAYS	ALWAYS	VERY OFTEN
F	23	1780.1	766.4	1019.1	908.8	1459.6	736.4	96.9	94.1	75.9	158	65.1	43.7	No	No	No	No	6	7	5	4	6	6	ALWAYS	RARELY	ALWAYS	VERY OFTEN	ALWAYS	SOMETIMES	ALWAYS	SOMETIMES	ALWAYS	ALWAYS	ALWAYS	VERY OFTEN
M	28	475.4	1201.6	529.2	909.3	125.1	1175.4	71.2	120.3	21	46.3	44.4	163.5	No	No	Yes	No	7	7	3	6	7	7	ALWAYS	NEVER	ALWAYS	VERY OFTEN	ALWAYS	ALWAYS	ALWAYS	RARELY	ALWAYS	ALWAYS	ALWAYS	VERY OFTEN
F	23	817.3	1100.4	588.7	1060.6	863.8	836.9	163.2	84.2	0	177.9	123.1	66.8	No	No	Yes	No	3	5	3	6	7	3	ALWAYS	NEVER	ALWAYS	VERY OFTEN	VERY OFTEN	VERY OFTEN	ALWAYS	NEVER	ALWAYS	ALWAYS	ALWAYS	VERY OFTEN
F	26	1028.6	712.1	890.1	1060.7	639.4	1351.2	116.7	120.1	82	97.7	50.5	158.1	No	No	Yes	No	7	2	5	7	7	5	ALWAYS	NEVER	VERY OFTEN	VERY OFTEN	ALWAYS	RARELY	ALWAYS	RARELY	ALWAYS	ALWAYS	ALWAYS	SOMETIMES
F	25	167.9	890.3	236.7	760.4	151	1065.5	19.9	99.2	0	78.4	2.8	70.5	No	No	Yes	Yes	6	5	3	7	7	6	ALWAYS	SOMETIMES	ALWAYS	ALWAYS	ALWAYS	ALWAYS	ALWAYS	NEVER	ALWAYS	ALWAYS	VERY OFTEN	ALWAYS
F	24	762.5	670.2	671.1	548.7	825.8	630.4	88.6	31.3	87.7	48.9	79	58.6	No	No	Yes	No	7	7	5	6	7	7	ALWAYS	SOMETIMES	ALWAYS	ALWAYS	VERY OFTEN	OFTEN	ALWAYS	VERY OFTEN	ALWAYS	ALWAYS	ALWAYS	OFTEN
F	24	2390	161.7	2016.9	1214	2191.2	239.1	218.4	0	210.4	0	165.1	2.8	No	Yes	Yes	No	7	7	5	2	7	4	ALWAYS	NEVER	ALWAYS	ALWAYS	ALWAYS	ALWAYS	ALWAYS	RARELY	VERY OFTEN	VERY OFTEN	ALWAYS	OFTEN
M	33	2594.3	130	1212.3	505.9	2435.1	641.5	230.4	0	159	6.5	208.2	0	No	No	Yes	No	3	6	5	7	7	7	ALWAYS	RARELY	ALWAYS	ALWAYS	OFTEN	SOMETIMES	ALWAYS	SOMETIMES	ALWAYS	VERY OFTEN	OFTEN	OFTEN
M	28	2910.9	205.7	1477.4	787.7	2154.8	279.7	304.1	33.7	230.1	27.9	265.4	12.6	No	No	Yes	No	4	3	5	4	5	4	ALWAYS	NEVER	SOMETIMES	OFTEN	VERY OFTEN	OFTEN	ALWAYS	RARELY	OFTEN	OFTEN	VERY OFTEN	OFTEN
M	25	1905.6	451.8	1312.5	563.4	1661.5	453.1	218	62.6	224.9	17.9	102.6	46.9	No	No	Yes	No	6	7	5	6	6	6	VERY OFTEN	NEVER	OFTEN	ALWAYS	VERY OFTEN	OFTEN	ALWAYS	NEVER	OFTEN	ALWAYS	ALWAYS	SOMETIMES
M	30	865.2	1034.4	514.5	677.8	534	947.4	21	163.3	24.1	144.5	61.4	169.8	No	No	Yes	No	7	4	5	6	7	6	ALWAYS	SOMETIMES	ALWAYS	ALWAYS	ALWAYS	ALWAYS	ALWAYS	ALWAYS	ALWAYS	ALWAYS	ALWAYS	ALWAYS
M	28	1872.2	563.5	1960.6	944.1	1869.2	424	267.7	34.4	238.4	37.3	135.5	50.4	No	No	Yes	No	3	5	4	4	4	4	ALWAYS	SOMETIMES	OFTEN	VERY OFTEN	ALWAYS	ALWAYS	ALWAYS	SOMETIMES	VERY OFTEN	ALWAYS	ALWAYS	ALWAYS
F	21	842.5	222.4	874.2	469.2	1051.6	450.2	145.1	6.2	74.2	46.8	228.5	11.1	No	No	Yes	Yes	4	6	5	4	6	4	ALWAYS	VERY OFTEN	ALWAYS	VERY OFTEN	ALWAYS	ALWAYS	ALWAYS	VERY OFTEN	ALWAYS	ALWAYS	ALWAYS	VERY OFTEN
F	27	2454.3	648.3	2061.4	555.3	1518.8	484	259.7	22	127.6	56.2	114.6	51.9	No	No	Yes	Yes	6	4	4	6	7	6	VERY OFTEN	NEVER	SOMETIMES	OFTEN	VERY OFTEN	ALWAYS	ALWAYS	NEVER	OFTEN	VERY OFTEN	ALWAYS	VERY OFTEN
M	29	420	450.9	544.1	583	455.9	561.7	77.1	29.7	18.1	36.7	56.6	71	No	No	No	No	5	5	5	4	7	4	ALWAYS	SOMETIMES	ALWAYS	VERY OFTEN	VERY OFTEN	OFTEN	ALWAYS	RARELY	ALWAYS	VERY OFTEN	VERY OFTEN	SOMETIMES
F	23	1143.7	1224.3	3.3	1702	315.3	1307.4	38.2	50.3	0	202.9	61.9	184.5	Missing data	Missing data	Missing data	Missing data	Missing data	Missing data	Missing data	Missing data	Missing data	Missing data	Missing data	Missing data	Missing data	Missing data	Missing data	Missing data	Missing data	Missing data	Missing data	Missing data	Missing data	Missing data
